# Supplementary material
Source: publisher site journal article supplement (https://www.dovepress.com/article/231914)
Supplement: Supplementary file 1 [file get_supplementary_file.php]

| Table S1. Primer of qRT-PCR. | |
| --- | --- |
| F:β-actin | TTCCAGAAGCTGACCTCTGAG |
| R:β-actin | TTCCAGAAGCTGACCTCTGAG |
| F:FTO | TTCCAGAAGCTGACCTCTGAG |
| R:FTO | TTCCAGAAGCTGACCTCTGAG |

| Table S2. Expression of FTO in lung cancer tissue and para--carcinoma tissue. | | | | |
| --- | --- | --- | --- | --- |
|  |  | FTO stating N（%） |  |  |
| Lung Tissue | N | Low expression | High expression | P value |
| Lung cancer | 20 | 8(40) | 12(60) | 0.387 |
| Para-carcinoma tissue | 20 | 10(50) | 10(50) |  |

| Table S3. Relationship between FTO expression and clinical pathological features in LUAD. | | | | | |
| --- | --- | --- | --- | --- | --- |
| Clinicopathological parameters | Total | FTO | | | |
| High | Low | p | |
| Sex |  |  |  | 0.373 | |
| Male | 12 | 6 | 6 |  | |
| Female | 8 | 6 | 2 |  | |
| Age |  |  |  | 0.147 | |
| <50 | 2 | 0 | 2 |  | |
| ≥50 | 18 | 12 | 6 |  | |
| BMI |  |  |  | 1 | |
| <24 | 5 | 3 | 2 |  | |
| ≥25 | 15 | 9 | 6 |  | |
| Differentiation |  |  |  | 0.537 | |
| Well/moderate | 17 | 11 | 6 |  | |
| Poor | 3 | 1 | 2 |  | |
| Depth of invasion |  |  |  | 0.603 | |
| T1/T2 | 15 | 8 | 7 |  | |
| T3/T4 | 5 | 4 | 1 |  | |
| LN metastasis |  |  |  | 0.161 | |
| Negative | 14 | 10 | 4 |  | |
| Positive | 6 | 2 | 4 |  | |
| Distant metastasis |  |  |  | 1 | |
| Negative | 19 | 11 | 8 |  | |
| Positive | 1 | 1 | 0 |  | |
| TNM stage |  |  |  | 1 | |
| I/II | 13 | 8 | 5 |  | |
| III/IV | 7 | 4 | 3 |  | |
| BMI: body mass index, LN metastasis: lymph node metastasis, TNM stage: T stage: tumor stage, and tumor grading. p <0.05 was considered statistically significant l | | | | |
